# Supplementary material for: Evaluation von Online Self-Assessments zur Studienwahl – Hindernisse, Chancen und Praxisbeispiele
Source: Atypon-hosted journal article supplement (doi:10.1024/1010-0652/a000382), 2024-04-19
Supplement: 1010-0652_a000382_esm1.pdf [file 1010-0652_a000382_esm1.pdf]

## Elektronisches Supplement 1

**Tabelle E1.** OSA-Angebot der JLU: Fächer und Angebotsverfügbarkeit

| <i>Fach</i>                      | <i>Zeitraum des Angebots<sup>a</sup></i> |
|----------------------------------|------------------------------------------|
| Agrarwissenschaften              | Juli 2015 bis März 2021                  |
| Angewandte Theaterwissenschaften | Mai 2020 bis März 2021                   |
| Anglistik                        | Mai 2020 bis März 2021                   |
| Chemie                           | Mai 2015 bis März 2021                   |
| Ernährungswissenschaften         | Juli 2015 bis März 2021                  |
| Germanistik                      | Mai 2020 bis März 2021                   |
| Materialwissenschaft             | Jan. 2018 bis März 2021                  |
| Ökotrophologie                   | Juli 2015 bis März 2021                  |
| Philosophie                      | Juni 2016 bis März 2021                  |
| Physik                           | Juni 2014 bis März 2021                  |
| Romanistik                       | Mai 2020 bis März 2021                   |
| Slavistik                        | Mai 2020 bis März 2021                   |
| Umweltmanagement                 | Juli 2015 bis März 2021                  |
| Wirtschaftswissenschaften        | Juni 2014 bis März 2021                  |

*Anmerkung:* <sup>a</sup> Mit Ausnahme der Zeiten, in denen JLU-Online-Systeme in Folge einer Cyber-Attacke von Dezember 2019 offline waren.

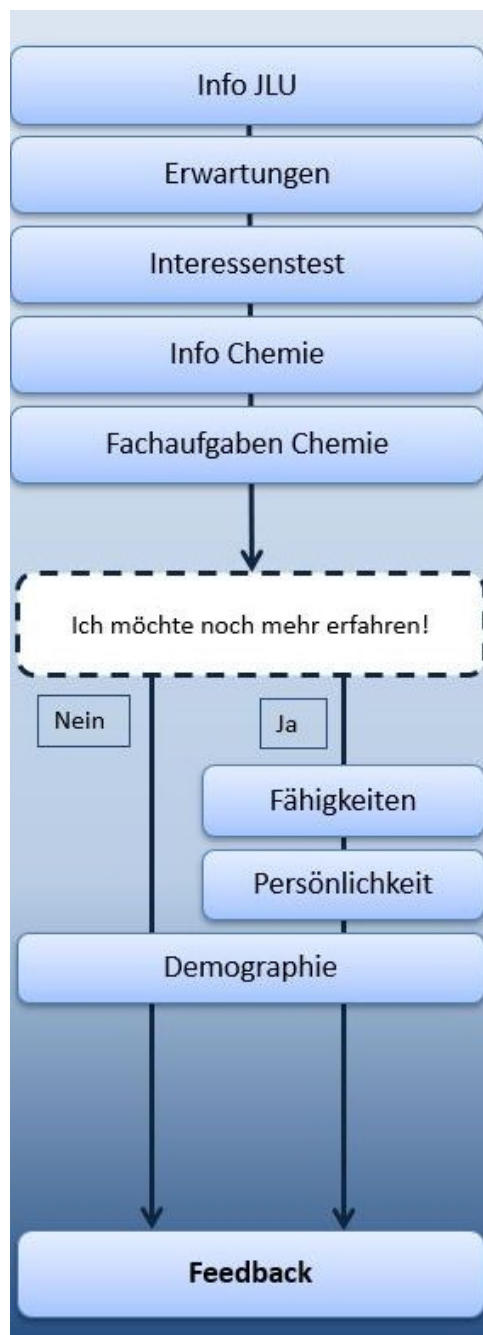

**Abbildung E1.** Screenshot der Darstellung des Aufbaus, exemplarisch für das Fach Chemie.
